# Supplementary material for: Neuron-specific spinal cord translatomes reveal a neuropeptide code for mouse dorsal horn excitatory neurons
Source: PubMed Central journal article supplement (PMC7933427; doi:10.1038/s41598-021-84667-y), 2021-03-04
Supplement: 41598_2021_84667_MOESM3_ESM.pdf [file 41598_2021_84667_MOESM3_ESM.pdf]

# Neuron-Specific Spinal Cord Translatomes Reveal a Neuropeptide Code for Mouse Dorsal Horn Excitatory Neurons

<sup>1,2</sup>Rebecca Rani Das Gupta, <sup>1</sup>Louis Scheurer, <sup>3</sup>Pawel Pelczar, <sup>1\*</sup>Hendrik Wildner, <sup>1,2\*</sup>Hanns Ulrich Zeilhofer

<sup>1</sup>Institute of Pharmacology and Toxicology, University of Zurich, Winterthurerstrasse 190, CH-8057 Zürich, Switzerland.

<sup>2</sup>Institute of Pharmaceutical Sciences, Swiss Federal Institute of Technology (ETH) Zurich, Vladimir-Prelog-Weg 1-5/10, CH-8090 Zurich, Switzerland

<sup>3</sup>Center for Transgenic Models, University of Basel, 4001 Basel, Switzerland.

\*corresponding authors: Dr. H.U. Zeilhofer & Dr. H. Wildner, <sup>1</sup>Institute of Pharmacology and Toxicology, University of Zurich, Winterthurerstrasse 190, CH-8057 Zürich, Switzerland.

Phone: +41 44 63 55938

Fax: +41 44 635 59 88

e-mail: [zeilhofer@pharma.uzh.ch](mailto:zeilhofer@pharma.uzh.ch)

[hwildner@pharma.uzh.ch](mailto:hwildner@pharma.uzh.ch)

## Enriched genes

| Gene      | Group | vGlut2        | vGAT          | Gad67         | vGlut2 vs. vGAT |          | vGlut2 vs. Gad67 |           | neuronal cell type                       |
|-----------|-------|---------------|---------------|---------------|-----------------|----------|------------------|-----------|------------------------------------------|
|           |       | [norm. count] | [norm. count] | [norm. count] | log2 Ratio      | FDR      | log2 Ratio       | FDR       |                                          |
| Ucn3      | NP    | 106 ± 34      | 0 ± 0         | 5.9 ± 10.2    | 9.87            | 8.52E-14 | 4.18             | 4.60E-04  | Glut3                                    |
| Lhx2      | TF    | 199 ± 35      | 0.96 ± 1.67   | 0 ± 0         | 7.62            | 9.29E-26 | 10.71            | 2.02E-35  | nd                                       |
| Olig3     | TF    | 176 ± 28      | 1.56 ± 1.86   | 12.2 ± 7.1    | 6.58            | 5.80E-20 | 3.82             | 4.92E-13  | nd                                       |
| Barhl1    | TF    | 382 ± 38      | 4.3 ± 2.9     | 0 ± 0         | 6.4             | 3.25E-49 | 11.65            | 5.24E-74  | nd                                       |
| Shox2     | TF    | 765 ± 32      | 11.5 ± 10.4   | 25.6 ± 20.9   | 6.12            | 7.88E-35 | 4.91             | 9.81E-21  | nd                                       |
| Chr       | NP    | 219 ± 44      | 3 ± 2.6       | 0 ± 0         | 6.05            | 5.17E-24 | 10.84            | 4.50E-39  | Glut9, 13, 15                            |
| Barhl2    | TF    | 480 ± 92      | 6.7 ± 7.8     | 15.4 ± 2.38   | 6.02            | 9.86E-37 | 4.94             | 7.52E-53  | nd                                       |
| Slc17a6   |       | 47533 ± 1973  | 753 ± 360     | 748 ± 191     | 5.98            | 6.32E-51 | 5.98             | 2.37E-110 | Glut1-15                                 |
| Tlx3      | TF    | 736 ± 64      | 13.7 ± 19.3   | 10.6 ± 9.6    | 5.78            | 1.63E-15 | 6.07             | 7.54E-69  | expression low / Glut2-8, 10, 11, 14     |
| Mgp       |       | 2163 ± 16.7   | 4.5 ± 7.8     | 15 ± 16.2     | 5.6             | 4.43E-12 | 3.82             | 1.87E-08  | ng                                       |
| Adcyap1   | NP    | 2469 ± 241    | 52 ± 32       | 73.3 ± 17.2   | 5.59            | 2.04E-42 | 5.07             | 8.12E-134 | Glut2-8, 10, 11, 15                      |
| Nrn1      | NF    | 20203 ± 1915  | 457 ± 164     | 458 ± 49      | 5.47            | 8.16E-86 | 5.45             | 1.18E-207 | Glut1-15                                 |
| Npff      | NP    | 317 ± 26      | 7.7 ± 10.9    | 7.9 ± 7.1     | 5.43            | 6.03E-15 | 5.34             | 1.38E-33  | Glut8, 9, 13, 15, Gaba8                  |
| Pou4f1    | TF    | 1462 ± 131    | 33.9 ± 21.8   | 43 ± 10.3     | 5.4             | 7.59E-50 | 5.09             | 1.94E-113 | Glut5, 13-15                             |
| Ctla2a    |       | 104 ± 25      | 2.2 ± 3.8     | 8.1 ± 7.1     | 5.37            | 7.48E-07 | 3.69             | 3.89E-05  | Glut5, 13-15                             |
| Lhx9      | TF    | 214.8 ± 23.5  | 5.1 ± 6.5     | 1.29 ± 1.56   | 5.37            | 6.79E-17 | 7.23             | 2.13E-34  | nd                                       |
| Pla2g5    |       | 507 ± 73      | 12.7 ± 22     | 16.2 ± 6.7    | 5.33            | 1.84E-05 | 4.98             | 9.34E-52  | nd                                       |
| Cacna2d1  |       | 6755 ± 656    | 170.2 ± 82    | 203 ± 46      | 5.32            | 8.04E-77 | 5.05             | 4.24E-175 | Glut1-15                                 |
| Vsx2      | TF    | 1501 ± 91     | 41.9 ± 27.1   | 38.1 ± 6      | 5.17            | 6.07E-53 | 5.29             | 1.09E-132 | nd                                       |
| Nms       | NP    | 217 ± 47      | 6.4 ± 11      | 1.48 ± 1.76   | 5.13            | 2.90E-07 | 6.96             | 2.35E-37  | expression low / ng                      |
| Tmem163   |       | 4153 ± 563    | 122 ± 69      | 118 ± 13.3    | 5.1             | 1.45E-45 | 5.12             | 3.92E-176 | nd                                       |
| Phox2a    | TF    | 136.9 ± 12.6  | 3.9 ± 6.7     | 3.4 ± 5.9     | 4.99            | 6.60E-07 | 5.17             | 4.54E-10  | nd                                       |
| Bdnf      | NF    | 1097 ± 70     | 44 ± 36       | 18.5 ± 11.9   | 4.63            | 4.02E-15 | 5.88             | 9.28E-90  | Glut1-3, 6, 7, 10, 11, 13-15             |
| Nmur2     | NPR   | 588 ± 84      | 24.9 ± 22.6   | 46 ± 38       | 4.59            | 6.13E-21 | 3.67             | 5.66E-16  | Glut7, 8, 15                             |
| Cbln1     | pNP   | 6341 ± 1471   | 310 ± 95      | 322 ± 53      | 4.36            | 1.17E-69 | 4.29             | 4.46E-110 | Glut1-4, 8                               |
| Nmu       | NP    | 571.9 ± 23.9  | 29 ± 34       | 7.6 ± 5.1     | 4.31            | 5.78E-06 | 6.17             | 3.25E-73  | Glut1, 2-9, 11, 14                       |
| Chrm5     |       | 177 ± 28      | 8.8 ± 8.4     | 23.1 ± 13.1   | 4.27            | 3.14E-09 | 2.91             | 7.15E-09  | expression low / Glut5, 7, 10, 11, Gaba1 |
| Nmb       | NP    | 204.9 ± 15.7  | 10.5 ± 8.2    | 4.5 ± 4.1     | 4.23            | 1.87E-12 | 5.51             | 1.08E-23  | expression low / Glut7, 9, 11, 12, Gaba8 |
| Tac2      | NP    | 5416 ± 363    | 299 ± 86      | 536 ± 36      | 4.18            | 2.90E-85 | 3.33             | 7.35E-131 | Glut1-11, 13, 14, Gaba4                  |
| Nts       | NP    | 2582 ± 331    | 143 ± 86      | 130.6 ± 5.9   | 4.18            | 9.72E-31 | 4.29             | 9.74E-125 | Glut1-9, 11, 13, 14, Gaba5               |
| Lmx1b     | TF    | 1745 ± 90     | 99.1 ± 24.9   | 62.9 ± 9.1    | 4.14            | 9.36E-78 | 4.77             | 2.02E-129 | nd                                       |
| Grpr      | NPR   | 292 ± 34      | 17.2 ± 22     | 26.7 ± 11.6   | 4.04            | 6.37E-07 | 3.42             | 3.11E-21  | Glut12-13                                |
| C1ql3     |       | 2262 ± 56     | 140 ± 22      | 171 ± 57      | 4               | 3.75E-94 | 3.71             | 5.63E-61  | Glut1, 4-7, 9, 11, 13, Gaba3             |
| Cpne4     |       | 2929 ± 473    | 186.8 ± 7.8   | 300 ± 40      | 3.97            | 1.07E-89 | 3.28             | 8.89E-71  | Glut2                                    |
| Lhx4      | TF    | 249.1 ± 21.4  | 16.8 ± 17.9   | 25.3 ± 9.5    | 3.9             | 3.62E-06 | 3.29             | 2.32E-18  | nd                                       |
| Slc17a8   |       | 186 ± 28      | 12.5 ± 9.3    | 35.4 ± 15.6   | 3.86            | 2.31E-09 | 2.39             | 1.94E-07  | ng                                       |
| Cck       | NP    | 7261 ± 778    | 538 ± 152     | 373 ± 74      | 3.76            | 4.13E-68 | 4.27             | 2.02E-140 | Glut1-3, 5, 13-14                        |
| Mafa      | TF    | 603 ± 78      | 46 ± 26       | 54.3 ± 40.2   | 3.71            | 3.26E-20 | 3.46             | 2.32E-17  | nd                                       |
| Prrxl1    | TF    | 1436 ± 65     | 124 ± 59      | 180.8 ± 23.9  | 3.54            | 5.86E-34 | 2.98             | 9.05E-61  | expression low / Glut3, 4, 6-11, 13      |
| F2h2      |       | 2146 ± 380    | 187 ± 156     | 264.1 ± 37.2  | 3.52            | 1.68E-12 | 3.01             | 1.04E-56  | Glut1, 3-14, Gaba2                       |
| Ebf2      | TF    | 3619 ± 436    | 355 ± 56      | 894.5 ± 59.7  | 3.35            | 8.47E-71 | 2.01             | 1.66E-40  | Glut1-13, Gaba14, 15                     |
| Aldh1a2   |       | 179 ± 75      | 17.6 ± 11.8   | 17 ± 14.2     | 3.35            | 1.42E-07 | 3.35             | 1.94E-07  | Glut14                                   |
| Serpina3g |       | 148 ± 36      | 15.8 ± 16.7   | 40.2 ± 8.1    | 3.23            | 8.13E-05 | 1.87             | 1.01E-04  | nd                                       |
| Nptx2     |       | 1325 ± 141    | 146.7 ± 24.5  | 181.2 ± 5.5   | 3.17            | 5.94E-48 | 2.86             | 1.79E-54  | expression low / Glut2, 6, 10, 12-14     |
| Grp       | NP    | 1085 ± 211    | 127 ± 39      | 105 ± 35      | 3.1             | 1.25E-28 | 3.36             | 2.48E-36  | Glut5-12                                 |
| Car12     |       | 423.4 ± 10.1  | 52.2 ± 9.1    | 71 ± 70       | 3.02            | 1.25E-23 | 2.56             | 1.64E-04  | Glut6-9                                  |
| Pou4f2    |       | 207 ± 39      | 25.7 ± 13.6   | 8.5 ± 4.4     | 3.01            | 1.79E-09 | 4.61             | 8.21E-21  | ng                                       |
| Sox14     | TF    | 169 ± 27      | 21 ± 21.8     | 1.11 ± 1.92   | 3.01            | 2.32E-03 | 7.24             | 1.52E-24  | nd                                       |
| Tac1      | NP    | 3017 ± 220    | 399 ± 92      | 848 ± 210     | 2.92            | 2.22E-48 | 1.82             | 1.09E-21  | Glut4, 9-11, 14, Gaba9                   |
| Trh       | NP    | 274 ± 44      | 37 ± 30       | 36.1 ± 16.6   | 2.88            | 1.43E-04 | 2.91             | 2.38E-14  | Glut3, 4, Gaba6                          |

**Table S2 Most enriched genes in vGlut2 vs. vGAT.** Group: TF = transcription factor, NP = neuropeptide, pNP = putative neuropeptide (classification of neuropeptides and putative neuropeptides is based on Burbach (2011)), NF = neurotrophic factor, NPR = neuropeptide receptor. sc data = single-cell data from Haring et al. (2018): nd = not detected, ng = not grouped.

| Gene          | Group | vGluT2        | vGAT          | Gad67         | vGluT2 vs. vGAT |           | vGluT2 vs. Gad67 |           |                                                     |
|---------------|-------|---------------|---------------|---------------|-----------------|-----------|------------------|-----------|-----------------------------------------------------|
|               |       | [norm. count] | [norm. count] | [norm. count] | log2 Ratio      | FDR       | log2 Ratio       | FDR       |                                                     |
| Tfap2b        | TF    | 30.6 ± 17.1   | 1455 ± 48     | 717 ± 60      | -5.58           | 2.29E-83  | -4.57            | 1.97E-48  | Gaba10, 13                                          |
| Pax8          | TF    | 63.7 ± 9      | 2726 ± 338    | 3115 ± 419    | -5.43           | 1.32E-140 | -5.63            | 1.05E-171 | Gaba2-8, 11, 12                                     |
| Sail3         | TF    | 201 ± 63      | 5381 ± 754    | 6224 ± 804    | -4.75           | 3.76E-92  | -4.97            | 5.74E-122 | Gaba2-15                                            |
| Slc32a1       |       | 734 ± 397     | 19147 ± 2462  | 20990 ± 2384  | -4.71           | 9.09E-39  | -4.85            | 1.12E-45  | Gaba1-15                                            |
| Ighg3         |       | 0.7 ± 1.21    | 20 ± 3        | 124 ± 11.5    | -4.69           | 1.24E-01  | -7.39            | 8.67E-18  | nd                                                  |
| Gad2          |       | 802 ± 111     | 18347 ± 3188  | 26077 ± 1196  | -4.52           | 4.58E-91  | -5.04            | 5.70E-156 | Gaba1-15                                            |
| Gad1          |       | 823 ± 140     | 18310 ± 4760  | 40767 ± 3643  | -4.48           | 1.69E-70  | -5.64            | 1.19E-127 | Gaba1-15                                            |
| Pax2          | TF    | 321 ± 168     | 6971 ± 499    | 7070 ± 544    | -4.45           | 3.30E-50  | -4.48            | 8.72E-56  | Gaba2-15                                            |
| Procr         | NP    | 116 ± 30      | 2499 ± 184    | 3953 ± 558    | -4.44           | 7.27E-92  | -5.11            | 2.70E-129 | Gaba1-15                                            |
| Lhx5          | TF    | 59.4 ± 14.7   | 1129 ± 164    | 1129 ± 121    | -4.24           | 6.52E-59  | -4.24            | 3.88E-73  | Gaba3, 4, 7, 8, 11-14                               |
| Gata3         | TF    | 6.8 ± 6.2     | 128 ± 45      | 18 ± 3.5      | -4.18           | 2.17E-06  | -1.39            | 6.05E-01  | ng                                                  |
| Slc6a5        |       | 1838 ± 823    | 32313 ± 2418  | 33567 ± 5237  | -4.14           | 3.30E-35  | -4.2             | 4.87E-43  | Gaba14                                              |
| Gbx1          | TF    | 67.3 ± 19.2   | 1172 ± 90     | 1359 ± 102    | -4.14           | 3.10E-58  | -4.36            | 6.33E-80  | expression low / Gaba2-4, 6-13                      |
| Tal1          | TF    | 11.8 ± 6.4    | 203.6 ± 11    | 21 ± 22.2     | -4.06           | 9.14E-15  | -0.83            | 7.89E-01  | ng                                                  |
| Dmkn          |       | 5.6 ± 7.9     | 90.9 ± 12.5   | 123 ± 28      | -4.04           | 1.31E-03  | -4.49            | 1.13E-06  | expression low / Gaba2, 3, 6, 10, 12                |
| Pax5          | TF    | 13.4 ± 9.9    | 203 ± 66      | 204 ± 121     | -3.91           | 1.47E-10  | -3.92            | 4.29E-10  | nd                                                  |
| Ap6           |       | 6.6 ± 7.4     | 78 ± 51       | 174 ± 32      | -3.57           | 2.34E-02  | -4.77            | 8.88E-12  | Gaba14, 15                                          |
| Dmrt3         | TF    | 16.2 ± 17.6   | 189 ± 22.2    | 112 ± 29      | -3.57           | 7.82E-06  | -2.81            | 2.75E-03  | nd                                                  |
| Pkd1l2        |       | 13.5 ± 5.3    | 159 ± 27      | 0 ± 0         | -3.53           | 2.11E-09  | 6.84             | 1.80E-02  | expression low / ng                                 |
| Slc6a1        |       | 1513 ± 451    | 15617 ± 4052  | 26070 ± 3382  | -3.37           | 1.05E-37  | -4.12            | 2.78E-69  | nd                                                  |
| Cdh3          |       | 64 ± 29       | 651 ± 253     | 1336 ± 184    | -3.36           | 4.75E-17  | -4.41            | 3.68E-58  | expression low / Glut2, Gaba3, Gaba8, Gaba10-12, 14 |
| Grb7          |       | 7.3 ± 6.9     | 73 ± 36       | 84 ± 38       | -3.33           | 2.46E-02  | -3.54            | 1.31E-03  | nd                                                  |
| Gata2         | TF    | 11.6 ± 9.5    | 109 ± 36      | 12.5 ± 10.3   | -3.23           | 3.46E-04  | -0.11            | 9.77E-01  | nd                                                  |
| Pkd2l1        |       | 41 ± 30       | 368 ± 110     | 30.4 ± 20.6   | -3.17           | 3.57E-11  | 0.42             | 8.20E-01  | nd                                                  |
| Alox12b       |       | 15.2 ± 12.5   | 133 ± 72      | 202 ± 105     | -3.13           | 2.46E-04  | -3.73            | 8.08E-09  | Gaba14, 15                                          |
| Htr3a         |       | 90.8 ± 21.7   | 752 ± 124     | 428 ± 75      | -3.05           | 1.11E-28  | -2.25            | 1.52E-15  | Gaba10, 13-15                                       |
| Asic4         |       | 63 ± 42       | 495 ± 31      | 610 ± 58      | -2.99           | 2.27E-13  | -3.3             | 1.25E-18  | Gaba14                                              |
| Slc30a3       |       | 585 ± 201     | 4564 ± 487    | 4491 ± 486    | -2.97           | 6.37E-40  | -2.96            | 1.78E-44  | Glut1, 3-4, Gaba1, 2, 4-7, 10-13                    |
| Ntsr1         | NPR   | 63.3 ± 15.9   | 480 ± 34      | 726 ± 64      | -2.92           | 1.85E-22  | -3.53            | 1.27E-45  | Gaba5, 14, 15                                       |
| Actr5         |       | 58.4 ± 21.8   | 439 ± 81      | 65.4 ± 19.3   | -2.9            | 1.60E-16  | -0.16            | 9.00E-01  | expression low / Gaba8-10, 13                       |
| Gpc4          |       | 42.3 ± 17     | 311 ± 48      | 602 ± 150     | -2.89           | 3.30E-14  | -3.85            | 1.86E-32  | expression low / Gaba2-4, 9, 11-14                  |
| Shisa3        |       | 38.7 ± 22.9   | 273 ± 26      | 246 ± 64      | -2.84           | 1.66E-10  | -2.69            | 1.33E-09  | nd                                                  |
| Klhl14        |       | 207.1 ± 5.1   | 1475 ± 154    | 1121 ± 4.4    | -2.83           | 8.97E-48  | -2.45            | 1.58E-42  | Gaba15                                              |
| Neurod2       | TF    | 259.8 ± 8.5   | 1842 ± 146    | 1826 ± 92     | -2.83           | 2.00E-55  | -2.82            | 7.20E-70  | Gaba3, 11, 14, 15                                   |
| Krt25         |       | 59.2 ± 3.9    | 414 ± 98      | 650 ± 196     | -2.81           | 1.40E-18  | -3.47            | 2.26E-34  | Gaba12                                              |
| Lhx1          | TF    | 154 ± 54      | 1063 ± 169    | 1133 ± 106    | -2.79           | 8.26E-25  | -2.89            | 6.51E-33  | Gaba5-10, 12, 13                                    |
| Neurod6       | TF    | 141 ± 76      | 918 ± 132     | 659 ± 107     | -2.72           | 1.94E-15  | -2.24            | 3.56E-11  | Gaba2-3, 10, 12-15                                  |
| C130060K24Rik |       | 14.5 ± 8.2    | 94 ± 67       | 93 ± 34       | -2.68           | 1.37E-02  | -2.67            | 7.61E-04  | nd                                                  |
| Neurod1       | TF    | 63 ± 26       | 391 ± 72      | 379 ± 58      | -2.64           | 7.82E-13  | -2.6             | 7.23E-15  | Gaba11, 14, 15                                      |
| Lgals9        |       | 219 ± 39      | 1343 ± 160    | 1813 ± 243    | -2.62           | 5.16E-34  | -3.06            | 3.38E-59  | Gaba1-15                                            |
| Ghsr          |       | 43.4 ± 22.2   | 263 ± 57      | 255 ± 48      | -2.62           | 5.63E-09  | -2.58            | 2.60E-10  | ng                                                  |
| Rasgrp1       |       | 237 ± 27      | 1256 ± 300    | 1337 ± 195    | -2.41           | 3.56E-25  | -2.5             | 9.85E-40  | Gaba1-15                                            |
| Erich2        |       | 7 ± 6.8       | 37.3 ± 14.9   | 154 ± 30      | -2.39           | 3.52E-01  | -4.43            | 4.02E-11  | ng                                                  |
| Islr2         |       | 32.1 ± 3.1    | 163 ± 68      | 248 ± 33      | -2.35           | 4.53E-05  | -2.96            | 4.51E-18  | Gaba5-7, 12                                         |
| Fblim1        |       | 42.2 ± 19.1   | 214 ± 28      | 179 ± 35      | -2.35           | 2.52E-07  | -2.1             | 4.24E-06  | ng                                                  |
| Irx1          | TF    | 23.7 ± 21.4   | 111.2 ± 20.4  | 216 ± 52      | -2.25           | 1.30E-01  | -3.21            | 2.28E-04  | ng                                                  |
| Nrl           | TF    | 28 ± 34       | 130 ± 31      | 127 ± 45      | -2.21           | 4.22E-02  | -2.18            | 2.00E-02  | Gaba8, 9                                            |
| Kcnf1         |       | 102.2 ± 24.4  | 466 ± 55      | 685 ± 156     | -2.19           | 1.02E-13  | -2.76            | 2.02E-25  | Gaba10, 12, 14                                      |
| Gbx2          | TF    | 88.7 ± 14.1   | 399 ± 119     | 348 ± 84      | -2.18           | 1.95E-10  | -1.99            | 2.18E-11  | Gaba10                                              |
| Irx2          | TF    | 23.1 ± 4.2    | 102 ± 50      | 244.3 ± 22    | -2.14           | 1.06E-02  | -3.4             | 3.21E-21  | ng                                                  |

**Table S3 Most enriched genes in vGAT vs. vGluT2.** Group: TF = transcription factor, NP = neuropeptide, pNP = putative neuropeptide (classification of neuropeptides and putative neuropeptides is based on Burbach (2011)), NF = neurotrophic factor, NPR = neuropeptide receptor. sc data = single-cell data from Haring et al. (2018): nd = not detected, ng = not grouped.

| Gene     | Group | vGluT2        | vGAT          | Gad67         | vGluT2 vs. vGAT |          | vGluT2 vs. Gad67 |           | neuronal cell type                       |
|----------|-------|---------------|---------------|---------------|-----------------|----------|------------------|-----------|------------------------------------------|
|          |       | [norm. count] | [norm. count] | [norm. count] | log2 Ratio      | FDR      | log2 Ratio       | FDR       |                                          |
| Barhl1   | TF    | 382 ± 38      | 4.3 ± 2.9     | 0 ± 0         | 6.4             | 3.25E-49 | 11.65            | 5.24E-74  | nd                                       |
| Chr      | NP    | 219 ± 44      | 3 ± 2.6       | 0 ± 0         | 6.05            | 5.17E-24 | 10.84            | 4.50E-39  | Glut9, 13, 15                            |
| Lhx2     | TF    | 199 ± 35      | 0.96 ± 1.67   | 0 ± 0         | 7.62            | 9.29E-26 | 10.71            | 2.02E-35  | ng                                       |
| Sox14    | TF    | 169 ± 27      | 21 ± 21.8     | 1.11 ± 1.92   | 3.01            | 2.32E-03 | 7.24             | 1.52E-24  | nd                                       |
| Lhx9     | TF    | 214.8 ± 23.5  | 5.1 ± 6.5     | 1.29 ± 1.56   | 5.37            | 6.79E-17 | 7.23             | 2.13E-34  | nd                                       |
| Nms      | NP    | 217 ± 47      | 6.4 ± 11      | 1.48 ± 1.76   | 5.13            | 2.90E-07 | 6.96             | 2.35E-32  | expression low / ng                      |
| Pkd1l2   |       | 13.5 ± 5.3    | 159 ± 27      | 0 ± 0         | -3.53           | 2.11E-09 | 6.84             | 1.80E-02  | expression low / ng                      |
| Nmu      | NP    | 571.9 ± 23.9  | 29 ± 34       | 7.6 ± 5.1     | 4.31            | 5.78E-06 | 6.17             | 3.25E-73  | Glut1, 3-9, 11, 14                       |
| Tlx3     | TF    | 736 ± 64      | 13.7 ± 19.3   | 10.6 ± 9.6    | 5.78            | 1.63E-15 | 6.07             | 7.54E-69  | expression low / Glut2-8, 10, 11, 14     |
| Slc17a6  |       | 47533 ± 1973  | 753 ± 360     | 748 ± 191     | 5.98            | 6.32E-51 | 5.98             | 2.37E-110 | Glut1-15                                 |
| Bdnf     | NF    | 1097 ± 70     | 44 ± 36       | 18.5 ± 11.9   | 4.63            | 4.02E-15 | 5.88             | 9.28E-90  | Glut1-3, 6, 7, 10, 11, 13-15             |
| Nmb      | NP    | 204.9 ± 15.7  | 10.5 ± 8.2    | 4.5 ± 4.1     | 4.23            | 1.87E-12 | 5.51             | 1.08E-23  | expression low / Glut7, 9, 11, 12, Gaba8 |
| Nrn1     | NF    | 20203 ± 1915  | 457 ± 164     | 458.1 ± 48.8  | 5.47            | 8.16E-86 | 5.45             | 1.18E-207 | Glut1-15                                 |
| Npff     | NP    | 317 ± 26      | 7.7 ± 10.9    | 7.9 ± 7.1     | 5.43            | 6.03E-15 | 5.34             | 1.38E-33  | Glut8, 9, 13, 15, Gaba8                  |
| Vsx2     | TF    | 1501 ± 91     | 42 ± 27       | 38.1 ± 6      | 5.17            | 6.07E-53 | 5.29             | 1.09E-132 | nd                                       |
| Phox2a   | TF    | 136.9 ± 12.6  | 3.9 ± 6.7     | 3.4 ± 5.9     | 4.99            | 6.60E-07 | 5.17             | 4.54E-10  | nd                                       |
| Tmem163  |       | 4153 ± 563    | 122 ± 69      | 118 ± 13.3    | 5.1             | 1.45E-45 | 5.12             | 3.92E-176 | ng                                       |
| Pou4f1   | TF    | 1462 ± 131    | 33.9 ± 21.8   | 43 ± 10.3     | 5.4             | 7.59E-50 | 5.09             | 1.94E-113 | Glut5, 13-15                             |
| Adcyap1  | NP    | 2469 ± 241    | 52 ± 32       | 73.3 ± 17.2   | 5.59            | 2.04E-42 | 5.07             | 8.12E-134 | Glut1, 3-11, 13-15                       |
| Cacna2d1 |       | 6755 ± 656    | 170 ± 82      | 202.6 ± 46.4  | 5.32            | 8.04E-77 | 5.05             | 4.24E-175 | Glut1-15, Gaba1                          |
| Pla2g5   |       | 507 ± 73      | 12.7 ± 22     | 16.2 ± 6.7    | 5.33            | 1.84E-05 | 4.98             | 9.34E-52  | Glut1, 2, 4, 5                           |
| Barhl2   | TF    | 480 ± 92      | 6.7 ± 7.8     | 15.4 ± 2.38   | 6.02            | 9.86E-37 | 4.94             | 7.52E-53  | nd                                       |
| Shox2    | TF    | 765 ± 32      | 11.5 ± 10.4   | 25.6 ± 20.9   | 6.12            | 7.88E-35 | 4.91             | 9.81E-21  | nd                                       |
| Lmx1b    | TF    | 1745 ± 90     | 99.1 ± 24.9   | 62.9 ± 9.1    | 4.14            | 9.36E-78 | 4.77             | 2.02E-129 | nd                                       |
| Pou4f2   | TF    | 207 ± 39      | 25.7 ± 13.6   | 8.5 ± 4.4     | 3.01            | 1.79E-09 | 4.61             | 8.21E-21  | ng                                       |
| Nts      | NP    | 2582 ± 331    | 143 ± 86      | 130.6 ± 5.9   | 4.18            | 9.72E-31 | 4.29             | 9.74E-125 | Glut1-9, 11, 13, 14, Gaba5               |
| Cbln1    | pNP   | 6341 ± 1471   | 310 ± 95      | 322 ± 53      | 4.36            | 1.17E-69 | 4.29             | 4.46E-110 | Glut1-4, 8                               |
| Cck      | NP    | 7261 ± 778    | 538 ± 152     | 373 ± 74      | 3.76            | 4.13E-68 | 4.27             | 2.02E-140 | Glut1-3, 5, 13, 14                       |
| Ucn3     | NP    | 106 ± 34      | 0 ± 0         | 5.9 ± 10.2    | 9.87            | 8.52E-14 | 4.18             | 4.60E-04  | Glut3                                    |
| Vip      | NP    | 171 ± 38      | 34.5 ± 7      | 10.4 ± 11.8   | 2.3             | 5.98E-06 | 4.05             | 1.50E-07  | ng                                       |
| Dmrt2    | TF    | 151.9 ± 2     | 29.9 ± 23.8   | 9.5 ± 6.9     | 2.32            | 8.58E-04 | 3.97             | 2.93E-11  | ng                                       |
| Olig3    | TF    | 176 ± 28      | 1.6 ± 1.9     | 12.2 ± 7.1    | 6.58            | 5.80E-20 | 3.82             | 4.92E-13  | nd                                       |
| Mgp      |       | 216.3 ± 16.7  | 4.5 ± 7.8     | 15 ± 16.2     | 5.6             | 4.43E-12 | 3.82             | 1.87E-08  | ng                                       |
| C1q13    |       | 2262 ± 56     | 140 ± 22      | 171 ± 57      | 4               | 3.75E-94 | 3.71             | 5.63E-61  | Glut1, 4-7, 9, 11, 13, Gaba3             |
| Ctla2a   |       | 104 ± 25      | 2.2 ± 3.8     | 8.1 ± 7.1     | 5.37            | 7.48E-07 | 3.69             | 3.89E-05  | ng                                       |
| Nmur2    | NPR   | 588 ± 84      | 24.9 ± 22.6   | 46 ± 38       | 4.59            | 6.13E-21 | 3.67             | 5.66E-16  | Glut7, 8, 15                             |
| Crhbp    |       | 435 ± 66      | 108.2 ± 6.7   | 33.7 ± 5.9    | 2.01            | 2.39E-12 | 3.67             | 9.56E-36  | Glut7, 8                                 |
| Clic6    |       | 217.2 ± 9.4   | 59 ± 43       | 18.1 ± 8      | 1.88            | 1.45E-03 | 3.58             | 3.01E-17  | ng                                       |
| Mafa     | TF    | 603 ± 78      | 46 ± 26       | 54 ± 40       | 3.71            | 3.26E-20 | 3.46             | 2.32E-17  | nd                                       |
| Grpr     | NPR   | 292 ± 34      | 17.2 ± 22     | 26.7 ± 11.6   | 4.04            | 6.37E-07 | 3.42             | 3.11E-21  | Glut12-13                                |
| Grp      | NP    | 1085 ± 211    | 127 ± 39      | 105 ± 35      | 3.1             | 1.25E-28 | 3.36             | 2.48E-36  | Glut5-12                                 |
| Aldh1a2  |       | 179 ± 75      | 17.6 ± 11.8   | 17 ± 14.2     | 3.35            | 1.42E-07 | 3.35             | 1.94E-07  | Glut14                                   |
| Tac2     | NP    | 5416 ± 363    | 299 ± 86      | 536 ± 36      | 4.18            | 2.90E-85 | 3.33             | 7.35E-131 | Glut1-11, 13, 14, Gaba4                  |
| Lhx4     | TF    | 249.1 ± 21.4  | 16.8 ± 17.9   | 25.3 ± 9.5    | 3.9             | 3.62E-06 | 3.29             | 2.32E-18  | nd                                       |
| Cpne4    |       | 2929 ± 473    | 186.8 ± 7.8   | 300 ± 40      | 3.97            | 1.07E-89 | 3.28             | 8.89E-71  | Glut2                                    |
| Rprm     |       | 511 ± 76      | 124 ± 82      | 57.6 ± 17.8   | 2.05            | 3.88E-06 | 3.14             | 2.48E-27  | Glut3-8, 14, 15                          |
| Ctxn3    |       | 189 ± 54      | 124 ± 41      | 21.5 ± 3.2    | 0.6             | 5.02E-01 | 3.12             | 3.64E-12  | ng                                       |
| F2rl2    |       | 2146 ± 380    | 187 ± 156     | 264 ± 37      | 3.52            | 1.68E-12 | 3.01             | 1.04E-56  | Glut1, 3-14, Gaba2                       |
| Prrxl1   | TF    | 1436 ± 65     | 124 ± 59      | 180.8 ± 23.9  | 3.54            | 5.86E-34 | 2.98             | 9.05E-61  | expression low / Glut3, 4, 6-11, 13      |
| Gm10684  |       | 316 ± 55      | 78 ± 54       | 40.5 ± 4.4    | 2.01            | 3.10E-04 | 2.95             | 3.43E-21  | ng                                       |

**Table S4 Most enriched genes in vGluT2 vs. Gad67.** Group: TF = transcription factor, NP = neuropeptide, pNP = putative neuropeptide (classification of neuropeptides and putative neuropeptides is based on Burbach (2011)), NF = neurotrophic factor, NPR = neuropeptide receptor. sc data = single-cell data from Haring et al. (2018): nd = not detected, ng = not grouped.

| Gene          | Group | vGlut2        | vGAT          | Gad67         | vGlut2 vs. vGAT |           | vGlut2 vs. Gad67 |           | neuronal cell type                                  |
|---------------|-------|---------------|---------------|---------------|-----------------|-----------|------------------|-----------|-----------------------------------------------------|
|               |       | [norm. count] | [norm. count] | [norm. count] | log2 Ratio      | FDR       | log2 Ratio       | FDR       |                                                     |
| Ighg3         |       | 0.7 ± 1.21    | 20.0 ± 3.0    | 124 ± 11.5    | -4.69           | 1.24E-01  | -7.39            | 8.67E-18  | nd                                                  |
| Gad1          |       | 823 ± 140     | 18310 ± 4760  | 40767 ± 3643  | -4.48           | 1.69E-70  | -5.64            | 1.19E-127 | Gaba1-15                                            |
| Pax8          | TF    | 63.7 ± 9      | 2726 ± 338    | 3115 ± 419    | -5.43           | 1.32E-140 | -5.63            | 1.05E-171 | Gaba2-8, 11, 12                                     |
| Chrna2        |       | 16.4 ± 14.6   | 9.28 ± 0.51   | 606 ± 100     | 0.8             | 9.30E-01  | -5.26            | 1.09E-16  | nd                                                  |
| Pnoc          | NP    | 116 ± 30      | 2499 ± 184    | 3953 ± 558    | -4.44           | 7.27E-92  | -5.11            | 2.70E-129 | Gaba1-15                                            |
| Gad2          |       | 802 ± 111     | 18347 ± 3188  | 26077 ± 1196  | -4.52           | 4.58E-91  | -5.04            | 5.70E-156 | Gaba1-15                                            |
| Sall3         | TF    | 201 ± 63      | 5381 ± 754    | 6224 ± 804    | -4.75           | 3.76E-92  | -4.97            | 5.74E-122 | Gaba2-15                                            |
| Slc32a1       |       | 734 ± 397     | 19147 ± 2462  | 20990 ± 2384  | -4.71           | 9.09E-39  | -4.85            | 1.12E-45  | Gaba1-15                                            |
| Aqp6          |       | 6.6 ± 7.4     | 78 ± 5.1      | 174 ± 3.2     | -3.57           | 2.34E-02  | -4.77            | 8.88E-12  | Gaba14, 15                                          |
| Tfap2b        | TF    | 30.6 ± 17.1   | 1455 ± 48     | 717 ± 60      | -5.58           | 2.29E-83  | -4.57            | 1.97E-48  | Gaba10, 13                                          |
| Dmkn          |       | 5.6 ± 7.9     | 90.9 ± 12.5   | 123 ± 2.8     | -4.04           | 1.31E-03  | -4.49            | 1.13E-06  | expression low / Gaba2, 3, 6, 10, 12                |
| Pax2          | TF    | 321 ± 168     | 6971 ± 499    | 7070 ± 544    | -4.45           | 3.30E-50  | -4.48            | 8.72E-56  | Gaba2-15                                            |
| Erich2        |       | 7 ± 6.8       | 37.3 ± 14.9   | 154 ± 3.0     | -2.39           | 3.52E-01  | -4.43            | 4.02E-11  | ng                                                  |
| Cdh3          |       | 64 ± 2.9      | 651 ± 253     | 1336 ± 184    | -3.36           | 4.75E-17  | -4.41            | 3.68E-58  | expression low / Glut2, Gaba3, Gaba8, Gaba10-12, 14 |
| Gbx1          | TF    | 67.3 ± 19.2   | 1172 ± 90     | 1359 ± 102    | -4.14           | 3.10E-58  | -4.36            | 6.33E-80  | expression low / Gaba2-4, 6-13                      |
| Lhx5          |       | 59.4 ± 14.7   | 1129 ± 164    | 1129 ± 121    | -4.24           | 6.52E-59  | -4.24            | 3.88E-73  | Gaba3, 4, 7, 8, 11-14                               |
| Slc6a5        |       | 1838 ± 823    | 32313 ± 2418  | 33567 ± 5237  | -4.14           | 3.30E-35  | -4.2             | 4.87E-43  | Gaba14                                              |
| Slc6a1        |       | 1513 ± 451    | 15617 ± 4052  | 26070 ± 3382  | -3.37           | 1.05E-37  | -4.12            | 2.78E-69  | ng                                                  |
| Pax5          | TF    | 13.4 ± 9.9    | 203 ± 66      | 204 ± 121     | -3.91           | 1.47E-10  | -3.92            | 4.29E-10  | nd                                                  |
| Gpc4          |       | 42.3 ± 1.7    | 311 ± 4.8     | 602 ± 15.0    | -2.89           | 3.30E-14  | -3.85            | 1.86E-32  | expression low / Gaba2-4, 9, 11-14                  |
| Alox12b       |       | 15.2 ± 12.5   | 133 ± 7.2     | 202 ± 10.5    | -3.13           | 2.46E-04  | -3.73            | 8.08E-09  | Gaba14, 15                                          |
| Grb7          |       | 7.3 ± 6.9     | 73 ± 3.6      | 84 ± 3.8      | -3.33           | 2.46E-02  | -3.54            | 1.31E-03  | ng                                                  |
| Ntsr1         | NPR   | 63.3 ± 15.9   | 480 ± 34      | 726 ± 64      | -2.92           | 1.85E-22  | -3.53            | 1.27E-45  | Gaba5, 14, 15                                       |
| Krt25         |       | 59.2 ± 3.9    | 414 ± 9.8     | 650 ± 19.6    | -2.81           | 1.40E-18  | -3.47            | 2.26E-34  | Gaba12                                              |
| Irx2          | TF    | 23.1 ± 4.2    | 102 ± 5.0     | 244.3 ± 2.2   | -2.14           | 1.06E-02  | -3.4             | 3.21E-21  | ng                                                  |
| Slc12a7       |       | 21.3 ± 13.7   | 90 ± 5.0      | 215.3 ± 7.2   | -2.08           | 7.18E-02  | -3.35            | 4.56E-13  | Gaba14                                              |
| Asic4         |       | 63 ± 4.2      | 495 ± 3.1     | 610 ± 5.8     | -2.99           | 2.27E-13  | -3.3             | 1.25E-18  | Gaba14                                              |
| Irx1          | TF    | 23.7 ± 21.4   | 111.2 ± 20.4  | 216 ± 5.2     | -2.25           | 1.30E-01  | -3.21            | 2.28E-04  | ng                                                  |
| Otp           | TF    | 112 ± 9.2     | 429 ± 9.6     | 967 ± 8.2     | -1.95           | 3.03E-04  | -3.13            | 6.67E-13  | nd                                                  |
| Lgals9        |       | 219 ± 3.9     | 1343 ± 160    | 1813 ± 24.3   | -2.62           | 5.16E-34  | -3.06            | 3.38E-59  | Gaba1-15                                            |
| Adamsl2       |       | 19.8 ± 2.7    | 58 ± 2.6      | 154 ± 5.8     | -1.56           | 3.22E-01  | -2.97            | 8.24E-09  | Gaba4                                               |
| Islr2         |       | 32.1 ± 3.1    | 163 ± 6.8     | 248 ± 3.3     | -2.35           | 4.53E-05  | -2.96            | 4.51E-18  | Gaba5-7, 12                                         |
| Slc30a3       |       | 585 ± 201     | 4564 ± 487    | 4491 ± 486    | -2.97           | 6.37E-40  | -2.96            | 1.78E-44  | Glut1, 3-4, Gaba1, 2, 4-7, 10-13                    |
| Crabp1        |       | 689 ± 3.2     | 2431 ± 336    | 5210 ± 54.3   | -1.82           | 4.04E-25  | -2.93            | 2.70E-101 | Glut9, Gaba2, 3, 7, 8, 14, 15                       |
| Lhx1          | TF    | 154 ± 5.4     | 1063 ± 16.9   | 1133 ± 10.6   | -2.79           | 8.26E-25  | -2.89            | 6.51E-36  | Gaba5-10, 12, 13                                    |
| Ppef1         |       | 19.2 ± 10.3   | 64.9 ± 8.7    | 140 ± 3.2     | -1.75           | 2.12E-01  | -2.86            | 1.11E-06  | Gaba11, 14                                          |
| Nfatc1        | TF    | 32.1 ± 14.3   | 135 ± 6.7     | 222.9 ± 1.1   | -2.09           | 7.21E-03  | -2.83            | 8.07E-12  | Gaba14, 15                                          |
| Neurod2       | TF    | 259.8 ± 8.5   | 1842 ± 146    | 1826 ± 9.2    | -2.83           | 2.00E-55  | -2.82            | 7.20E-70  | Gaba3, 11, 14, 15                                   |
| Dmrt3         | TF    | 16.2 ± 17.6   | 189 ± 22.2    | 112 ± 2.9     | -3.57           | 7.82E-06  | -2.81            | 2.75E-03  | nd                                                  |
| Kcnf1         |       | 102.2 ± 24.4  | 466 ± 5.5     | 685 ± 15.6    | -2.19           | 1.02E-13  | -2.76            | 2.02E-25  | Gaba10, 12, 14                                      |
| Shisa3        |       | 38.7 ± 22.9   | 273 ± 2.6     | 246 ± 6.4     | -2.84           | 1.66E-10  | -2.69            | 1.33E-09  | ng                                                  |
| C130060K24R1k |       | 14.5 ± 8.2    | 94 ± 6.7      | 93 ± 3.4      | -2.68           | 1.37E-02  | -2.67            | 7.61E-04  | ng                                                  |
| Neurod1       | TF    | 63 ± 2.6      | 391 ± 7.2     | 379 ± 5.8     | -2.64           | 7.82E-13  | -2.6             | 7.23E-15  | Gaba11, 14, 15                                      |
| En1           | TF    | 47.1 ± 11.6   | 164 ± 3.0     | 281 ± 11.9    | -1.8            | 5.41E-04  | -2.59            | 2.92E-11  | nd                                                  |
| Ghsr          |       | 43.4 ± 22.2   | 263 ± 5.7     | 255 ± 4.8     | -2.62           | 5.63E-09  | -2.58            | 2.60E-10  | ng                                                  |
| Rasgrp1       |       | 237 ± 2.7     | 1256 ± 300    | 1337 ± 19.5   | -2.41           | 3.56E-25  | -2.5             | 9.85E-40  | Gaba1-15                                            |
| Irgm1         |       | 127.8 ± 12.4  | 559 ± 11.5    | 715 ± 12.4    | -2.13           | 2.50E-14  | -2.49            | 5.19E-27  | expression low / ng                                 |
| Klhl14        |       | 207.1 ± 5.1   | 1475 ± 15.4   | 1121 ± 4.4    | -2.83           | 8.97E-48  | -2.45            | 1.58E-42  | Gaba15                                              |
| Pdyn          | NP    | 384 ± 7.7     | 966 ± 280     | 2075 ± 38.5   | -1.33           | 1.94E-06  | -2.44            | 1.46E-33  | Gaba3-5                                             |
| Npy           | NP    | 1262 ± 32.5   | 3605 ± 81.2   | 6622 ± 88.0   | -1.52           | 1.24E-10  | -2.41            | 3.66E-38  | Gaba1-15                                            |

**Table S5 Most enriched genes in Gad67 vs. vGlut2.** Group: TF = transcription factor, NP = neuropeptide, pNP = putative neuropeptide (classification of neuropeptides and putative neuropeptides is based on Burbach (2011)), NF = neurotrophic factor, NPR = neuropeptide receptor. sc data = single-cell data from Haring et al. (2018): nd = not detected, ng = not grouped.

## Neurotransmitter receptor expression

### Glutamate receptors

| Gene   | vGluT2<br>[norm. count] | vGAT<br>[norm. count] | Gad67<br>[norm. count] | vGluT2 vs. vGAT |                 | vGluT2 vs. Gad67 |                 |
|--------|-------------------------|-----------------------|------------------------|-----------------|-----------------|------------------|-----------------|
|        | Mean ± Stddev           | Mean ± Stddev         | Mean ± Stddev          | log2<br>Ratio   | FDR             | log2<br>Ratio    | FDR             |
| Gria1  | 3853 ± 429              | 6189 ± 1252           | 9054 ± 821             | -0.69           | <b>1.92E-03</b> | <b>-1.24</b>     | <b>4.49E-19</b> |
| Gria2  | 7524 ± 295              | 5010 ± 579            | 6896 ± 1352            | 0.59            | <b>2.98E-03</b> | 0.11             | 7.16E-01        |
| Gria3  | 3327 ± 203              | 3423 ± 208            | 3229 ± 304             | -0.04           | 9.66E-01        | 0.03             | 9.17E-01        |
| Gria4  | 4879 ± 727              | 4476 ± 238            | 4437 ± 544             | 0.12            | 8.68E-01        | 0.13             | 6.66E-01        |
| Grik1  | 200 ± 56                | 465 ± 183             | 453 ± 94               | <b>-1.22</b>    | <b>2.32E-03</b> | <b>-1.19</b>     | <b>8.15E-05</b> |
| Grik2  | 1074 ± 299              | 2411 ± 362            | 2676 ± 353             | <b>-1.17</b>    | <b>3.08E-07</b> | <b>-1.33</b>     | <b>7.94E-11</b> |
| Grik3  | 737 ± 97                | 2753 ± 114            | 3288 ± 275             | <b>-1.90</b>    | <b>9.00E-30</b> | <b>-2.17</b>     | <b>2.74E-44</b> |
| Grik4  | 651 ± 67                | 721 ± 179             | 735 ± 44               | -0.15           | 8.97E-01        | -0.19            | 5.66E-01        |
| Grik5  | 2341 ± 392              | 2481 ± 229            | 2289 ± 396             | -0.09           | 9.28E-01        | 0.02             | 9.66E-01        |
| Grin1  | 16293 ± 2625            | 14053 ± 2385          | 17130 ± 3003           | 0.21            | 8.29E-01        | -0.08            | 8.54E-01        |
| Grin2a | 3811 ± 484              | 3237 ± 352            | 3463 ± 703             | 0.23            | 5.72E-01        | 0.13             | 7.07E-01        |
| Grin2b | 4048 ± 192              | 3630 ± 254            | 4605 ± 535             | 0.16            | 7.71E-01        | -0.20            | 3.65E-01        |
| Grin2c | 41.4 ± 18.9             | 97.4 ± 21.4           | 116.4 ± 7.8            | <b>-1.24</b>    | 2.43E-01        | <b>-1.51</b>     | <b>1.25E-02</b> |
| Grin2d | 1775 ± 178              | 2062 ± 121            | 2485 ± 454             | -0.22           | 6.25E-01        | -0.50            | <b>1.75E-02</b> |
| Grin3a | 3791 ± 271              | 1965 ± 135            | 2127 ± 174             | 0.95            | <b>1.79E-09</b> | 0.82             | <b>2.86E-09</b> |
| Grin3b | 47.5 ± 11.5             | 49.0 ± 33.0           | 58.9 ± 26.6            | -0.06           | 9.92E-01        | -0.32            | 8.08E-01        |

**Table S6 Ionotropic glutamate receptors (AMPA, kainate and NMDA receptors).** Significant (FDR ≤ 0.05) and |log2 ratio| ≥ 1 enrichment values are highlighted in bold.

| Gene | vGluT2<br>[norm. count] | vGAT<br>[norm. count] | Gad67<br>[norm. count] | vGluT2 vs. vGAT |                 | vGluT2 vs. Gad67 |                 |
|------|-------------------------|-----------------------|------------------------|-----------------|-----------------|------------------|-----------------|
|      | Mean ± Stddev           | Mean ± Stddev         | Mean ± Stddev          | log2<br>Ratio   | FDR             | log2<br>Ratio    | FDR             |
| Grm1 | 2407 ± 156              | 1632 ± 116            | 1912 ± 419             | 0.56            | <b>5.76E-03</b> | 0.32             | 2.15E-01        |
| Grm2 | 157.4 ± 23.5            | 184 ± 109             | 315.9 ± 8.2            | -0.22           | 9.27E-01        | <b>-1.02</b>     | <b>2.70E-04</b> |
| Grm3 | 424 ± 79                | 946 ± 237             | 1243 ± 198             | <b>-1.16</b>    | <b>1.86E-05</b> | <b>-1.57</b>     | <b>1.06E-14</b> |
| Grm4 | 2116 ± 315              | 1574 ± 110            | 1714 ± 263             | 0.43            | 1.03E-01        | 0.29             | 2.55E-01        |
| Grm5 | 5322 ± 309              | 7181 ± 1239           | 9795 ± 1607            | -0.43           | 1.07E-01        | -0.89            | <b>2.53E-08</b> |
| Grm6 | 0 ± 0                   | 0 ± 0                 | 0 ± 0                  | 0.00            | NA              | 0.00             | NA              |
| Grm7 | 1559 ± 184              | 1732 ± 161            | 1985 ± 194             | -0.15           | 8.25E-01        | -0.36            | 9.15E-02        |
| Grm8 | 420 ± 56                | 447 ± 29              | 549 ± 176              | -0.09           | 9.48E-01        | -0.40            | 3.07E-01        |

**Table S7 Metabotropic glutamate receptors.** Significant (FDR ≤ 0.05) |log2 ratio| ≥ 1 enrichment values are highlighted in bold. NA = not applicable.

## GABA receptors

| Gene   | vGluT2<br>[norm. count] | vGAT<br>[norm. count] | Gad67<br>[norm. count] | vGluT2 vs. vGAT |                 | vGluT2 vs. Gad67 |                 |
|--------|-------------------------|-----------------------|------------------------|-----------------|-----------------|------------------|-----------------|
|        | Mean ± Stddev           | Mean ± Stddev         | Mean ± Stddev          | log2<br>Ratio   | FDR             | log2<br>Ratio    | FDR             |
| Gabra1 | 4236 ± 493              | 4361 ± 357            | 5504 ± 592             | -0.04           | 9.68E-01        | -0.39            | <b>2.87E-02</b> |
| Gabra2 | 977 ± 83                | 643 ± 93              | 638.4 ± 19.4           | 0.60            | <b>2.39E-02</b> | 0.60             | <b>1.76E-03</b> |
| Gabra3 | 5357 ± 498              | 4949 ± 585            | 6146 ± 837             | 0.11            | 8.84E-01        | -0.21            | 3.57E-01        |
| Gabra4 | 653 ± 39                | 555 ± 63              | 530.4 ± 22.5           | 0.23            | 7.36E-01        | 0.29             | 3.08E-01        |
| Gabra5 | 5260 ± 959              | 2574 ± 84             | 2355 ± 322             | <b>1.03</b>     | <b>2.11E-09</b> | <b>1.15</b>      | <b>3.97E-12</b> |
| Gabra6 | 0 ± 0                   | 0 ± 0                 | 0 ± 0                  | 0.00            | NA              | 0.00             | NA              |
| Gabrb1 | 2706 ± 238              | 2797 ± 353            | 3234 ± 418             | -0.05           | 9.64E-01        | -0.27            | 2.01E-01        |
| Gabrb2 | 1637 ± 81               | 1152 ± 94             | 1364 ± 183             | 0.51            | <b>2.12E-02</b> | 0.25             | 3.06E-01        |
| Gabrb3 | 11663 ± 1308            | 9704 ± 1598           | 10398 ± 1382           | 0.26            | 6.50E-01        | 0.15             | 6.18E-01        |
| Gabrg1 | 593.2 ± 16.6            | 511 ± 119             | 941 ± 211              | 0.21            | 8.11E-01        | -0.68            | <b>4.50E-03</b> |
| Gabrg2 | 6631 ± 484              | 5536 ± 958            | 7043 ± 1243            | 0.26            | 5.52E-01        | -0.10            | 7.60E-01        |
| Gabrg3 | 1553 ± 158              | 1431 ± 452            | 1736 ± 237             | 0.12            | 9.24E-01        | -0.17            | 5.58E-01        |
| Gabrd  | 36.2 ± 11.0             | 40 ± 52               | 28.8 ± 6.0             | -0.13           | 9.89E-01        | 0.32             | 8.51E-01        |
| Gabre  | 97.6 ± 7.8              | 44.1 ± 11.7           | 58.7 ± 24.2            | <b>1.14</b>     | 2.46E-01        | 0.72             | 3.44E-01        |
| Gabrp  | 0 ± 0                   | 0 ± 0                 | 4.1 ± 7.0              | 0.00            | NA              | <b>-5.13</b>     | NA              |
| Gabrq  | 538.8 ± 24.7            | 217 ± 71              | 330 ± 85               | <b>1.31</b>     | <b>2.06E-05</b> | 0.69             | <b>1.65E-02</b> |
| Gabrr1 | 12.1 ± 11.5             | 0.32 ± 0.56           | 0 ± 0                  | <b>4.85</b>     | 3.62E-01        | <b>6.68</b>      | 6.79E-02        |
| Gabrr2 | 8.1 ± 8.3               | 17.6 ± 15.3           | 8.3 ± 9.1              | <b>-1.13</b>    | 9.06E-01        | -0.06            | NA              |
| Gabrr3 | 0 ± 0                   | 0 ± 0                 | 0 ± 0                  | 0.00            | NA              | 0.00             | NA              |

**Table S8 Ionotropic GABA receptors (GABA<sub>A</sub> and  $\alpha$ -p receptor).** Significant (FDR ≤ 0.05) and |log2 ratio| ≥ 1 enrichment values are highlighted in **bold**. NA = not applicable.

| Gene   | vGluT2<br>[norm. count] | vGAT<br>[norm. count] | Gad67<br>[norm. count] | vGluT2 vs. vGAT |          | vGluT2 vs. Gad67 |          |
|--------|-------------------------|-----------------------|------------------------|-----------------|----------|------------------|----------|
|        | Mean ± Stddev           | Mean ± Stddev         | Mean ± Stddev          | log2<br>Ratio   | FDR      | log2<br>Ratio    | FDR      |
| Gabbr1 | 26433 ± 4708            | 26183 ± 3572          | 28147 ± 4127           | 0.01            | 9.96E-01 | -0.10            | 8.39E-01 |
| Gabbr2 | 10007 ± 784             | 9451 ± 171            | 10552 ± 1623           | 0.08            | 9.36E-01 | -0.09            | 8.01E-01 |

**Table S9 Metabotropic GABA receptors (GABA<sub>B</sub>).** Significant (FDR ≤ 0.05) and |log2 ratio| ≥ 1 enrichment values are highlighted in **bold**.

## Glycine receptors

| Gene | vGluT2<br>[norm. count] | vGAT<br>[norm. count] | Gad67<br>[norm. count] | vGluT2 vs. vGAT |          | vGluT2 vs. Gad67 |          |
|------|-------------------------|-----------------------|------------------------|-----------------|----------|------------------|----------|
|      | Mean ± Stddev           | Mean ± Stddev         | Mean ± Stddev          | log2<br>Ratio   | FDR      | log2<br>Ratio    | FDR      |
| Glr1 | 13117 ± 927             | 9331 ± 786            | 9775 ± 1424            | 0.49            | 8.37E-02 | 0.41             | 5.40E-02 |
| Glr2 | 1320 ± 213              | 1348 ± 353            | 1382 ± 182             | -0.03           | 9.83E-01 | -0.08            | 8.39E-01 |
| Glr3 | 710 ± 77                | 545 ± 86              | 667 ± 66               | 0.38            | 3.95E-01 | 0.08             | 8.45E-01 |
| Glr4 | 30.9 ± 13.8             | 20.8 ± 11.3           | 30.5 ± 13.1            | 0.57            | 9.17E-01 | 0.01             | 9.98E-01 |
| Glr5 | 19773 ± 2483            | 17713 ± 2342          | 17187 ± 2695           | 0.16            | 9.01E-01 | 0.19             | 6.08E-01 |

**Table S10 Glycine receptors.** Significant (FDR ≤ 0.05) and |log2 ratio| ≥ 1 enrichment values are highlighted in **bold**.

## Acetylcholine receptors

| Gene    | vGluT2<br>[norm. count] | vGAT<br>[norm. count] | Gad67<br>[norm. count] | vGluT2 vs. vGAT |                 | vGluT2 vs. Gad67 |                 |
|---------|-------------------------|-----------------------|------------------------|-----------------|-----------------|------------------|-----------------|
|         | Mean ± Stddev           | Mean ± Stddev         | Mean ± Stddev          | log2<br>Ratio   | FDR             | log2<br>Ratio    | FDR             |
| Chrna1  | 4.5 ± 7.8               | 3.8 ± 6.7             | 0 ± 0                  | 0.22            | NA              | <b>5.27</b>      | NA              |
| Chrna2  | 16.4 ± 14.6             | 9.3 ± 0.5             | 606 ± 100              | 0.80            | 9.30E-01        | <b>-5.26</b>     | <b>1.09E-16</b> |
| Chrna3  | 117 ± 39                | 211 ± 53              | 420.9 ± 15.4           | -0.86           | 1.71E-01        | <b>-1.87</b>     | <b>4.08E-10</b> |
| Chrna4  | 4316 ± 654              | 3537 ± 467            | 3457 ± 643             | 0.29            | 4.33E-01        | 0.31             | 1.95E-01        |
| Chrna5  | 26.2 ± 16.7             | 8.9 ± 8.5             | 97.6 ± 22.5            | <b>1.56</b>     | 7.82E-01        | <b>-1.92</b>     | <b>1.79E-02</b> |
| Chrna6  | 89.1 ± 43.0             | 3.3 ± 2.9             | 0 ± 0                  | <b>4.66</b>     | <b>1.59E-05</b> | <b>9.54</b>      | <b>1.05E-12</b> |
| Chrna7  | 513 ± 114               | 493 ± 72              | 674 ± 239              | 0.05            | 9.75E-01        | -0.41            | 3.58E-01        |
| Chrna9  | 0 ± 0                   | 0 ± 0                 | 3.0 ± 5.2              | 0.00            | NA              | <b>-4.73</b>     | NA              |
| Chrna10 | 0 ± 0                   | 3.9 ± 6.7             | 6.6 ± 6.5              | <b>-5.13</b>    | NA              | <b>-5.82</b>     | NA              |
| Chrb1   | 4.3 ± 7.4               | 0 ± 0                 | 0 ± 0                  | <b>5.28</b>     | NA              | <b>5.21</b>      | NA              |
| Chrb2   | 1921 ± 238              | 1820 ± 286            | 2018 ± 214             | 0.08            | 9.43E-01        | -0.08            | 8.08E-01        |
| Chrb3   | 38.1 ± 14.1             | 14.0 ± 11.3           | 8.5 ± 7.9              | <b>1.42</b>     | 6.81E-01        | <b>2.15</b>      | 2.25E-01        |
| Chrb4   | 11.0 ± 3.7              | 58 ± 28               | 95.5 ± 21.1            | <b>-2.39</b>    | 8.09E-02        | <b>-3.14</b>     | <b>8.46E-06</b> |
| Chrnd   | 0 ± 0                   | 0 ± 0                 | 0 ± 0                  | 0.00            | NA              | 0.00             | NA              |
| Chrne   | 0 ± 0                   | 0 ± 0                 | 0 ± 0                  | 0.00            | NA              | 0.00             | NA              |
| Chrng   | 3.8 ± 6.6               | 0 ± 0                 | 0 ± 0                  | <b>5.10</b>     | NA              | <b>5.03</b>      | NA              |

**Table S11 Ionotropic acetylcholine receptors (nicotinic).** Significant (FDR ≤ 0.05) and |log2 ratio| ≥ 1 enrichment values are highlighted in **bold**. NA = not applicable.

| Gene  | vGluT2<br>[norm. count] | vGAT<br>[norm. count] | Gad67<br>[norm. count] | vGluT2 vs. vGAT |                 | vGluT2 vs. Gad67 |                 |
|-------|-------------------------|-----------------------|------------------------|-----------------|-----------------|------------------|-----------------|
|       | Mean ± Stddev           | Mean ± Stddev         | Mean ± Stddev          | log2<br>Ratio   | FDR             | log2<br>Ratio    | FDR             |
| Chrm1 | 25.6 ± 7.2              | 30.2 ± 6.1            | 19.3 ± 7.0             | -0.24           | 9.70E-01        | 0.39             | 8.53E-01        |
| Chrm2 | 5176 ± 811              | 4818 ± 667            | 5664 ± 782             | 0.10            | 9.13E-01        | -0.14            | 6.30E-01        |
| Chrm3 | 497 ± 148               | 1026 ± 160            | 1183 ± 141             | <b>-1.05</b>    | <b>2.63E-04</b> | <b>-1.27</b>     | <b>1.17E-07</b> |
| Chrm4 | 89 ± 34                 | 56 ± 28               | 130.5 ± 19.8           | 0.66            | 7.68E-01        | -0.57            | 3.88E-01        |
| Chrm5 | 177 ± 28                | 8.8 ± 8.4             | 23.1 ± 13.1            | <b>4.27</b>     | <b>3.14E-09</b> | <b>2.91</b>      | <b>7.15E-09</b> |

**Table S12 Metabotropic acetylcholine receptors (muscarinic).** Significant (FDR ≤ 0.05) and |log2 ratio| ≥ 1 enrichment values are highlighted in **bold**. NA = not applicable.

## Serotonin receptors

| Gene  | vGluT2<br>[norm. count] | vGAT<br>[norm. count] | Gad67<br>[norm. count] | vGluT2 vs. vGAT |                 | vGluT2 vs. Gad67 |                 |
|-------|-------------------------|-----------------------|------------------------|-----------------|-----------------|------------------|-----------------|
|       | Mean ± Stddev           | Mean ± Stddev         | Mean ± Stddev          | log2<br>Ratio   | FDR             | log2<br>Ratio    | FDR             |
| Htr1a | 598 ± 103               | 1503 ± 240            | 1627 ± 154             | <b>-1.33</b>    | <b>2.38E-10</b> | <b>-1.46</b>     | <b>6.27E-16</b> |
| Htr1b | 803 ± 175               | 529 ± 132             | 543 ± 75               | 0.60            | 1.23E-01        | 0.55             | <b>4.26E-02</b> |
| Htr1d | 102 ± 37                | 214 ± 46              | 468 ± 102              | <b>-1.08</b>    | <b>4.51E-02</b> | <b>-2.22</b>     | <b>9.50E-12</b> |
| Htr1f | 68 ± 28                 | 115 ± 91              | 60.3 ± 8.1             | -0.75           | 7.50E-01        | 0.16             | 8.99E-01        |
| Htr2a | 315 ± 56                | 466 ± 115             | 510 ± 71               | -0.57           | 2.29E-01        | -0.71            | <b>1.03E-02</b> |
| Htr2b | 0 ± 0                   | 0 ± 0                 | 0 ± 0                  | 0.00            | NA              | 0.00             | NA              |
| Htr2c | 6685 ± 1060             | 10081 ± 1679          | 10828 ± 846            | -0.59           | <b>2.50E-02</b> | -0.71            | <b>3.75E-05</b> |
| Htr3a | 90.8 ± 21.7             | 752 ± 124             | 428 ± 75               | <b>-3.05</b>    | <b>1.11E-28</b> | <b>-2.25</b>     | <b>1.52E-15</b> |
| Htr3b | 3.1 ± 5.4               | 7.7 ± 5.9             | 7.0 ± 6.7              | <b>-1.29</b>    | NA              | <b>-1.15</b>     | NA              |
| Htr4  | 197.5 ± 23.6            | 130.5 ± 23.8          | 167 ± 60               | 0.60            | 3.60E-01        | 0.23             | 7.16E-01        |



|       |             |             |             |       |                 |       |          |
|-------|-------------|-------------|-------------|-------|-----------------|-------|----------|
| Htr5a | 525 ± 41    | 784 ± 59    | 699 ± 78    | -0.58 | <b>3.30E-02</b> | -0.43 | 9.91E-02 |
| Htr5b | 12.7 ± 10.1 | 17.2 ± 15.6 | 23.7 ± 19.8 | -0.45 | 9.68E-01        | -0.92 | 7.10E-01 |
| Htr6  | 87.4 ± 18.1 | 66 ± 35     | 109 ± 35    | 0.39  | 8.88E-01        | -0.33 | 6.90E-01 |
| Htr7  | 804 ± 48    | 1069 ± 120  | 828 ± 85    | -0.41 | 1.77E-01        | -0.05 | 8.90E-01 |

**Table S13 Serotonin receptors.** Significant (FDR ≤ 0.05) and |log<sub>2</sub> ratio| ≥ 1 enrichment values are highlighted in **bold**. NA = not applicable.

### Adrenergic receptors

| Gene   | vGluT2<br>[norm. count] | vGAT<br>[norm. count] | Gad67<br>[norm. count] | vGluT2 vs. vGAT           |                 | vGluT2 vs. Gad67          |                 |
|--------|-------------------------|-----------------------|------------------------|---------------------------|-----------------|---------------------------|-----------------|
|        | Mean ± Stddev           | Mean ± Stddev         | Mean ± Stddev          | log <sub>2</sub><br>Ratio | FDR             | log <sub>2</sub><br>Ratio | FDR             |
| Adra1a | 576 ± 61                | 503 ± 112             | 595 ± 153              | 0.19                      | 8.52E-01        | -0.06                     | 9.14E-01        |
| Adra1b | 498 ± 152               | 753 ± 98              | 743 ± 95               | -0.60                     | 1.19E-01        | -0.59                     | 5.25E-02        |
| Adra1d | 101 ± 28                | 110.0 ± 20.3          | 117 ± 49               | -0.13                     | 9.66E-01        | -0.22                     | 8.07E-01        |
| Adra2a | 1992 ± 386              | 942 ± 155             | 981 ± 189              | <b>1.08</b>               | <b>6.89E-07</b> | <b>1.01</b>               | <b>1.27E-06</b> |
| Adra2b | 1.40 ± 2.42             | 6.0 ± 10.5            | 26.8 ± 15.0            | <b>-2.05</b>              | NA              | <b>-4.21</b>              | 5.84E-02        |
| Adra2c | 389 ± 103               | 329.5 ± 17.7          | 302 ± 82               | 0.24                      | 8.29E-01        | 0.35                      | 4.56E-01        |
| Adrb1  | 105 ± 46                | 204 ± 46              | 162 ± 84               | -0.97                     | 1.02E-01        | -0.65                     | 3.46E-01        |
| Adrb2  | 9.0 ± 11.4              | 3.8 ± 6.7             | 0 ± 0                  | <b>1.21</b>               | NA              | <b>6.25</b>               | NA              |
| Adrb3  | 12.5 ± 12.5             | 30.8 ± 22.7           | 24.5 ± 3.2             | <b>-1.30</b>              | 8.12E-01        | -0.99                     | 7.08E-01        |

**Table S14 Adrenergic receptors.** Significant (FDR ≤ 0.05) and |log<sub>2</sub> ratio| ≥ 1 enrichment values are highlighted in **bold**. NA = not applicable.

### Dopamine receptors

| Gene | vGluT2<br>[norm. count] | vGAT<br>[norm. count] | Gad67<br>[norm. count] | vGluT2 vs. vGAT           |          | vGluT2 vs. Gad67          |                 |
|------|-------------------------|-----------------------|------------------------|---------------------------|----------|---------------------------|-----------------|
|      | Mean ± Stddev           | Mean ± Stddev         | Mean ± Stddev          | log <sub>2</sub><br>Ratio | FDR      | log <sub>2</sub><br>Ratio | FDR             |
| Drd1 | 38.0 ± 5.9              | 48.8 ± 12.7           | 46 ± 37                | -0.36                     | 9.28E-01 | -0.29                     | 8.65E-01        |
| Drd2 | 610 ± 180               | 961 ± 198             | 1215 ± 127             | -0.66                     | 7.09E-02 | <b>-1.01</b>              | <b>1.50E-05</b> |
| Drd3 | 9.6 ± 6.7               | 8.9 ± 4.3             | 25.0 ± 19.6            | 0.11                      | NA       | <b>-1.37</b>              | 5.10E-01        |
| Drd4 | 1.39 ± 2.41             | 23.5 ± 19.1           | 9.4 ± 5.4              | <b>-4.02</b>              | 2.41E-01 | <b>-2.70</b>              | NA              |
| Drd5 | 221 ± 39                | 135 ± 100             | 209 ± 35               | 0.71                      | 5.10E-01 | 0.07                      | 9.17E-01        |

**Table S15 Dopamine receptors.** Significant (FDR ≤ 0.05) and |log<sub>2</sub> ratio| ≥ 1 enrichment values are highlighted in **bold**. NA = not applicable.

### Histamine receptors

| Gene | vGluT2<br>[norm. count] | vGAT<br>[norm. count] | Gad67<br>[norm. count] | vGluT2 vs. vGAT           |                 | vGluT2 vs. Gad67          |                 |
|------|-------------------------|-----------------------|------------------------|---------------------------|-----------------|---------------------------|-----------------|
|      | Mean ± Stddev           | Mean ± Stddev         | Mean ± Stddev          | log <sub>2</sub><br>Ratio | FDR             | log <sub>2</sub><br>Ratio | FDR             |
| Hrh1 | 39.1 ± 9.8              | 35.2 ± 21.0           | 73 ± 38                | 0.14                      | 9.81E-01        | -0.92                     | 3.32E-01        |
| Hrh2 | 80.1 ± 21.4             | 77 ± 36               | 68.8 ± 7.8             | 0.05                      | 9.92E-01        | 0.21                      | 8.37E-01        |
| Hrh3 | 942 ± 181               | 1428 ± 79             | 1523 ± 94              | -0.60                     | <b>1.36E-02</b> | -0.71                     | <b>4.04E-04</b> |
| Hrh4 | 0 ± 0                   | 0 ± 0                 | 0 ± 0                  | 0.00                      | NA              | 0.00                      | NA              |

**Table S16 Histamine receptors.** Significant (FDR ≤ 0.05) and |log<sub>2</sub> ratio| ≥ 1 enrichment values are highlighted in **bold**. NA = not applicable.
